# Supplementary material for: Physiological response of a golden tide alga ( Sargassum muticum ) to the interaction of ocean acidification and phosphorus enrichment
Source: Copernicus journal article supplement (doi:10.5194/bg-14-671-2017), 2017-02-10
Supplement: Supplementary file 1 [file bg-14-671-2017-supplement.zip]

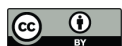

## *Supplement of*

# **Physiological response of a golden tide alga (*Sargassum muticum*) to the interaction of ocean acidification and phosphorus enrichment**

**Zhiguang Xu et al.**

*Correspondence to:* Guang Gao ([biogaoguang@126.com](mailto:biogaoguang@126.com))

- [bg-14-671-2017-supplement-title-page.pdf](#)
- [Data set.xlsx](#)

The copyright of individual parts of the supplement might differ from the CC-BY 3.0 licence.
